# Supplementary material for: Virulence and Antimicrobial Resistance in Campylobacter spp. from a Peruvian Pediatric Cohort
Source: Scientifica (Cairo). 2017 Oct 9;2017:7848926. doi: 10.1155/2017/7848926 (PMC5654289; doi:10.1155/2017/7848926)
Supplement: Supplementary file 1 — Campylobacter spp. database. [file 7848926.f1.xlsx]

## Sheet: Article data
Supplemental Material
Virulence and antimicrobial resistance in Campylobacter spp. 1 from a Peruvian
pediatric cohort
Angela Lluque a, Maribel Riveros a, Ana Prada a, Theresa J. Ochoa, a,b, Joaquim Ruiz c
aInstituto de Medicina Tropical, Universidad Peruana Cayetano Heredia, Lima, Perú.
bDepartment of Epidemiology, School of Public Health, University of Texas Health
Science Center at Houston, Houston, USA. cISGlobal, Barcelona Ctr. Int. Health Res.
(CRESIB), Hospital Clínic - Universitat de Barcelona, Barcelona, Spain

## Sheet: database
Strain	Specie	Type	Age (months)	Sex	TE	E	CIP	NA	AMP	C	AZM	23S rRNA	GyrA	cdtABC	cdtA	cdtB	cdtC	iam1	iam2	iam3	cadF
LF 1384 20 JUL 2010	2	0	18	2	2	0	0	0		2	0	A2075G	1	0	0	0	0	1	1	1	1
LF 1460 29 JUL 2010	2	1	12	1	1	0	0	0		>20	0	A2075G	1	0	0	0	0	1	1	1	1
LF 1424 12 ago 2010	1	0	18	1		2	0	0			2		1	1	1	1	1	0	0	0	1
LF 1377 11 AGO 2010	1	0	18	2	0	2	0	0	0	22	2		1	0	1	1	1	0	0	0	1
LF 1406 14 AGO 2010	1	1	16	2		0	0	9			0	wt	1	1	1	1	1	0	0	0	1
LF 1381 24 JUL 2010	2	1	12	1	2	2	0	0	15	2	2		1	0	0	0	0	1	1	1	1
LF 1387 3 AGO 2010	2	1	18	1	2	0	0	0	22	2	0	A2075G	1	0	0	0	0	1	1	1	1
LF 1406 19 JUN 2010	2	1	16	2	2	2	2	2		2	2		0	0	0	0	0	1	1	1	1
LF 1345 7 JUN 2010	1	0	18	1	0	2	0	0		2	2		1	1	1	1	1	0	0	0	1
LF 1250 6 OCT 2009	1	1	17	2	0	2	2	0			2		2	1	1	1	1	0	0	0	1
LF 1348 12 ENE 2010	2	0	18	1	0	2	0	0		2	2		1	0	0	1	0	1	1	1	1
LF 1406 12 JUN 2010	2	1			2	2	0	0		2	2		1	0	1	1	1	1	1	1	1
LF 1406 2 JUN 2010	1	1	16	2	0	2	0	0	0	2	2		1	1	1	1	1	1	1	1	1
LF 1489 20 AGO 2010	1	1	17	2	0	2	2	0			2		1	1	1	1	1	0	0	0	1
LF 1213 6 JUL 2009/10	2	0	15	2		2	0	0			2		1	0	0	0	0	1	1	1	1
LF 1206 3 AGO 2009	2	0	14	1	0	2	0	0			2		1	0	0	0	0	1	1	1	1
PABLO 22 JUL 2009	1	1			0	2	0	0			2		1	1	1	1	1	0	0	0	1
LF 1267 27 OCT 2009	2	0	17	1	0	0	0	0			0	A2075G	1	0	0	0	0	1	1	1	1
LF 1324 20 DIC 2009	2	0	15	1	2	2	0	0			2		1	0	0	0	0	1	1	1	1
LF 1250 7 AGO 2009	2	1	17	2	0	2	0	0			2		1	1	1	1	1	0	0	0	1
LF 1245 27 JUN 2009	2	0	17	1		2	0	0			2		1	0	0	0	0	1	1	1	1
LF 1314 8 ENE 2010	1	0	18	2		2	0	0			2		1	1	1	1	1	0	0	0	1
LF 1259 21 DIC 2009	2	0	18	2	0	0	0	0			0	A2075G	1	0	0	0	0	1	1	1	1
LF 1244 1 JUL 2010/09	1	0	14	2	0	2	0	0			2		1	1	1	1	1	0	0	0	1
LF 1426 1 JUL 2010	1	0	17	2	2	2	2	2			2		1	1	1	1	1	0	0	0	1
LF 1396 17 JUN 2010	1	0	16	2	0	2	2	2			2		0	0	1	1	1	0	0	0	1
LF 1260 15 DIC 2009	2	0	13	1	2	2	0	0			2		1	0	0	0	0	1	1	1	1
LF 1439 20 AGO 2010	1	1	15	2	1	2	0	0			2		1	1	1	1	1	0	0	0	1
LF 1248 15 DIC 2009	2	0	13	2	0	2	2	2			2		0	0	1	1	1	1	1	1	1
LF 1348 23 JUN 2010	2	1	18	1	0	2	0	0			2		1	0	0	0	0	1	1	1	1
LF 1405 9 JUN 2010	1	1	13	1									1	1	1	1	1	0	0	0	1
LF 1301 3 NOV 2009	1	1	17	1	2	2	0	0		2	2		1	1	1	1	1	0	0	0	1
LF 1313 9 NOV 2009	1	1	13	2	0	2	0	0	0	2	2		1	1	1	1	1	0	0	0	1
JMA 22 JUN 2009	1	1			1	2	0	0			2		1	1	1	1	1	0	0	0	1
LF 1308 14 NOV 2009	1	1	17	1	2	2	0	0			2		1	1	1	1	1	0	0	0	1
LF 1256 5 NOV 2009	2	1	15	1	2	0	0	0			0	A2075G	1	0	0	0	0	1	0	1	1
LF 1262 1 OCT 2009	2	0	14	2	0	2	0	0			2		1	0	0	1	0	1	1	1	1
MAP 25 MAY 2009	1	1			2	2	0	0			2		1	1	1	1	1	0	0	0	1
LF 1299 19 OCT 2009	1	1	17	2	0	2	2	2			2		1	1	1	1	1	0	0	0	1
LF 1387 10 MAR 2010	2	1	18	1	0	2	1	14			2		1	0	0	1	0	1	1	1	1
LF 1299 20/29 ENE 2010	1	1	17	2	2	S	R	0			S		1	0	1	1	1	0	0	0	1
LF 1344 9 MAR 2010	2	1	17	1	R	R	0	0			R	A2075G	1	0	0	0	0	1	1	1	1
LF 1350 12 MAR 2010	2	0	16	2	2	2	0	0		2	2		1	0	0	0	0	1	1	1	1
LF 1366 11 MAR 2010	2	1	14	2	0	2	0	0			2		1	0	0	0	0	1	0	1	1
LF 1381 12 MAR 2010	1	1	12	1	2	2	0	0			2		1	1	1	1	1	0	0	0	1
LF 1433 02 SET 2010	2	0	17	2	2	0	0	0			0	A2075G	1	0	0	0	0	1	1	1	1
LF 1263 14 ENE 2010	1	0	16	1	0	2	0	0			2		1	1	1	1	1	0	0	0	1
LF 1407 30 ABR 2010	2	0	17	1	0	2	0	0			2		1	0	1	1	1	1	1	1	1
LF 1347 14 ABR 2010	2	0	14	1	2	2	0	0			2		1	0	0	1	0	1	1	1	1
LF 1462 6 JUL 2010	1	0	18	2	0	2	0	0			2		1	1	1	1	1	0	0	0	1
LF 1439 21/2 JUL 2010	2	1	15	2	2	2	0	0			2		1	0	0	1	0	1	1	1	1
LF 1369 20 ABR 2010	1	0	14	2	2	2	0	0			2		1	1	1	1	1	0	0	0	1
LF 1247 1 SET 2009	1	0	16	2	2	2	0	0			2		1	1	1	1	1	0	0	0	1
LF 1424 7 JUL 2010	1	0	18	1	0	2	0	0			2		1	1	0	0	0	1	1	1	1
LF 1383 27 MAY 2010	2	0	17	1	1	2	2	2			2		0	0	0	1	0	1	1	1	1
LF 1262 20 AGO 2009	2	0	14	2		0	0	0			0	wt	1	0	0	1	0	1	1	1	1
LF 1306 14 NOV 2009	1	1	15	2	2	2	2	2			2		1	1	1	1	1	0	0	0	1
LF 1453 22 JUN 2010	2	0	18	2	2	2	2	2			2		0	0	1	1	0	1	1	1	1
LF 1418 26 MAY 2010	1	0	17	1	0	2	0	0			2		1	1	1	1	1	0	0	0	1
LF 1459 30 JUN 2010	2	0	12	1	0	2	0	0			2		1	0	0	1	0	1	1	1	1
LF 1230 10 AGO 2009	2	0	18	1	1	2	0	0			2		1	0	0	0	0	1	1	1	1
LF 1353 27 ABR 2010	2	1	16	1	0	0	0	0	0	2	0	A2075G *	1	0	0	1	0	1	1	1	1
LF 1395 29 ABR 2010	2	0	11	2	0	0	0	0	0	2	0	A2075G	1	0	0	1	0	1	1	1	1
LF 1232 2 SET 2009	1	1	17	2		2	0	0			2		1	1	1	1	1	1	1	1	1
LF 1279 22 SET 2009	1	1	12	1	1	2	0	0			2		1	1	1	1	1	0	0	0	1
LF 1403 3 JUL 2010	1	0	13	1	0	2	0	0			2	wt	1	1	1	1	1	0	0	0	1
LF 1294 25 SET 2009	1	0	18	2	0	2	0	0			2		1	1	1	1	1	0	0	0	1
LF 1380 23 FEB 2010	1	0			0	2	0	0			2		1	0	1	1	1	0	0	0	0
LF 1254 22 SET 2009	1	1	16	1		2	0	0			2		1	1	1	1	1	0	0	0	1
LF 1213 9 NOV 2009	1	1	13	2	0	2	0	0			2		1	1	1	1	1	0	0	0	1
LF 1332 18 ENE 2010	1	0	14	1	2	2	0	0			2		1	1	1	1	1	0	0	0	1
LF 1314 9 FEB 2010	1	0	18	2	0	2	0	0			2		1	1	1	1	1	0	0	0	1
LF 1335 11 FEB 2010	2	1	16	2	0	2	0	0			2		1	0	0	0	0	1	1	1	1
LF 1347 10 FEB 2010	2	0	14	1	0	2	0	0			2		1	0	1	1	1	0	0	0	1
LF 1368 10 FEB 2010	1	0	12	1	0	2	0	0			2		1	1	1	1	1	0	0	0	1
LF 1330 15 FEB/jun 2010	2	0	13	1		2	0	0			2		1	0	0	1	1	0	0	1	1
LF 1431 6 MAY 2010	1	0	17	2	0	2	0	0			2		1	0	1	1	1	0	0	0	1
LF 1340 5 MAY 2010	1	0	15	1	2	2	2	26			2		0	1	1	1	1	0	0	0	1
LF 1277 22 SET 2010/09	1	0	18	2	2	2	0	0			2		1	1	1	1	1	0	0	0	1
LF 1351 17 FEB 2010	1	0	13	2									1	1	1	1	1	0	0	0	1
LF 1486 8 SET 2010	1	0	17	2	0	2	0	0			2		1	1	1	1	1	0	0	0	1
LF 1317 14 ABR 2010	2	0	14	1	2	2	0	0			2		1	0	0	0	0	1	1	1	1
LF 1450 27 JUL 2010	2	1	12	2	2	0	0	0			0	A2075G *	1	1	1	1	1	1	1	1	1
LF 1426 18 SET 2010	1	1	17	2	2	2	0	0			2		1	1	1	1	1	0	0	0	1
LF 1405 22 SET 2010	2	1	13	1	0	2	0	0			2		1	0	0	0	0	1	1	1	1
LF 1503 21 SET 2010	1	1	17	1	0	0	0	0			0	A2075G	1	1	1	1	1	1	1	1	1
LF 1498 16 SET 2010	1	0	18	2		2	0	0			2		1	1	1	1	1	0	0	0	1
LF 1395 13 SET 2010	1	0	11	2	0	2	0	0			2		1	1	1	1	1	0	0	0	1
LF 1262 8 SET 2009	2	1	14	2	0	2	0	0			2		1	0	0	1	0	1	1	1	1
LF 1351 18 JUN 2010	1	0	13	2	0	2	0	0	11	2	2		1	1	1	1	1	0	0	0	1
LF 1273 09 ENE 2010	1	1	16	1	0	2	0	0			2		1	1	1	1	1	0	0	0	1
ANG	1	1			0	2	0	0			2		1	1	1	1	1	0	0	0	1
1325 2 DIC 2009	1	1	17	1	2	2	0	0			2		1	1	1	1	1	0	0	0	1
1334 5 DIC 2009	1	1	18	2	2	2	1	0			2		1	0	1	1	1	0	0	0	1
1331 26 ENE 2010	2	0	12	2	0	2	0	0			2		1	0	0	1	0	1	1	1	1
1298 2 NOV 2009	1	0	17	2									1	1	1	1	1	0	0	0	1
CORA	1	1			0	2	0	0			2		1	1	1	1	1	0	0	0	1
1524 8 MAR 2011	1	0	12	1	0	2	0	0			2		1	0	1	1	1	0	0	0	1
1508 9 MAR/may 2011	1	0	12	1	0	2	0	0			2		1	1	1	1	1	0	0	0	1
1523 12 MAR 2011	2	1	17	1	1	2	0	0			2		1	0	0	0	0	1	1	1	1
1520 11 MAR 2011	1	0	18	2	2	2	0	0			2		1	1	1	1	1	0	0	0	1
1344 9 MAR 2010	2	1	17	1	2	2	0	0			2		1	0	0	0	0	1	1	1	1
1482 7 FEB 2011	1	1											1	0	1	1	1	0	0	0	1
1526 3 FEB 2011	1	0	18	2									0	1	1	1	1	0	0	0	1
1503 4 FEB 2011	1	1	17	1	0	2	0	0			2		1	1	1	1	1	0	0	0	1
1495 17 MAR 2011	1	0	18	1									0	1	1	1	1	0	0	0	1
1519 28 FEB 2011	1	0	16	2	0	2	0	0			2		1	1	1	1	1	0	0	0	1
1262 01 oct 2009	2	0	14	2									1	0	0	1	0	1	1	1	1
1299 29 ene 2010	2	1	17	2		2	0	0			2		1	0	0	1	0	1	1	1	1
1238 22 SET 2009	2	0	15	1									1	0	0	0	0	1	1	1	1
BJM 29 set 29	2	1				2	0	0			2		1	0	0	1	0	1	1	1	1
1379 26 ene/FEB 2010	1	1	15	1									1	1	1	1	1	0	0	0	1
1537 26 FEB 2011	1	0	14	1	2-S	2	0	0			2		1	1	1	1	1	0	0	0	1
1542 28 MAR 2011	1	0	12	2		2	0	0					1	1	1	1	1	0	0	0	1
1455 14 DIC 2010	1	0	14	2	0	2	0	0			2		1	1	1	1	1	0	0	0	1
1495 17 feb 2011	1	0	18	1	0	2	2	2			2		0	1	1	1	1	0	0	0	1
1525 22 DIC 2010	1	0	17	2	0	2	0	0			2		1	1	1	1	1	0	0	0	1
1528 24 ENE 2011	1	1	16	1	0	2	0	0			2		1	1	1	1	1	0	0	0	1
1521 24 FEB 2011	1	1	17	1									1	1	1	1	1	0	0	0	1
1496 13 OCT 2010	1	0	18	2	2	0	2	2			0	A2075G	0	0	1	1	1	0	0	0	1
1487 30 SET 2010	1	0	18	1									1	1	1	1	1	0	0	0	1
1511 12 OCT 2010	1	1	18	1									1	1	1	1	1	0	0	0	1
1493 12 OCT 2010	1	1	17	1									1	1	1	1	1	0	0	0	1
1494 7 oct 2010	1	0	18	1										1	1	1	1	0	0	0	1
1489 24 SET 2010	1	0	17	2	0	2	0	0			2		1	1	1	1	1	0	0	0	1
1314/1313 16/17 feb 2010	1	0	13	2									1	1	1	1	1	0	0	0	1
1238 8/17 oct 2009	1	1	15	1									1	1	1	1	1	0	0	0	1
1538 17 DIC 2010	1	0	12	2									1	1	1	1	1	0	0	0	1
1499 7 oct 2010	1	1	12	1	0	2	0	0			2		1	1	1	1	1	0	0	0	1
1438 25 oct 2010	1	0	17	1									1	1	1	1	1	0	0	0	1
1452 18 DIC 2010	1	1	17	2	2	2	0	0			2	wt	1	1	1	1	1	0	0	0	1
1262 20 ago 2009	2	0	14	2									1	0	0	1	0	1	1	1	1
1537 29 marzo 2011	1	0	14	1		2	0	0			2		1	1	1	1	1	0	0	0	1
1454 9 nov 2010	1	0	18	1									1	1	1	1	1	0	0	0	0
1471 19 oct 2010	1	0	13	1	2	2	0	0			2		1	1	1	1	1	0	0	0	1
1459 11 nov 2010	1	1	12	1									1	0	1	1	1	0	0	1	1
1407 25 jun 2010	1	0	17	1									1	1	1	1	1	0	0	0	1
1322 20 ene 2010	2	1	17	2									1	0	0	1	0	1	1	1	1
1349 13/19 ene 2010	2	0	12	1										0	0	0	1	1	0	1	1
1324 21 ene 2010	2	1	15	1									1	0	0	0	0	1	1	1	1
1340 10/9 feb 2010	1	0	15	1									1	1	1	1	1	0	0	0	1
1324 4 mar 2010	1	0	15	1									1	1	1	1	1	0	0	0	1
1306 11 mar 2010	1	0	15	2									1	1	1	1	1	0	0	0	1
1302 11 /10 abr 2011	2	1	13	1									1	0	0	1	0	1	1	1	1
1414 15 abr 2010	1	0	17	2									1	1	1	1	1	0	0	0	1
1333 06 abr 2010	1	0	17	2									1	1	1	1	1	0	0	0	1
1405 12 may 2010	1	0	13	1										0	1	1	1	0	0	0	1
1369 7/6 abr 2010	1	1	14	2									1	1	1	1	1	0	0	0	1
1446 16/15 jun 2010	1	0	17	2									0	1	1	1	1	0	0	0	1

## Sheet: Hoja2
	Code	0	1	2
	Specie		C.jejuni	C.coli
	Type	Control	Case
	Sex		Male	Female
	42°C	No Growth	Growth
Tetracycline	TE	Resistant	Intermediate	Susceptible
Erythromycin	E	Resistant	Intermediate	Susceptible
Ciprofloxacin	CIP	Resistant	Intermediate	Susceptible
Nalidixic acid	NA	Resistant	Intermediate	Susceptible
Azithromycin	AZM	Resistant	Intermediate	Susceptible
	GyrA	wt	Ile-86	Ala-86
	cdt	Absence	Presence
	cdtA	Absence	Presence
	cdtB	Absence	Presence
	cdtC	Absence	Presence
	iam1	Absence	Presence
	iam2	Absence	Presence
	iam3	Absence	Presence
	cadF	Absence	Presence
